# Supplementary material for: Polyp dimorphism in the Mediterranean Red Coral Corallium rubrum: siphonozooids are precursors to autozooids
Source: Frontiers journal article supplement (doi:10.3389/fmars.2025.1512361), 2025-01-30
Supplement: Table_1.docx [file Table_1.docx]

| - 24mm T14 Macro 2x Probe Cine (Digit Access - importateur Laowa, 130-136 Avenue Joseph Kessel, ACTIPOLE BAT.A, 78960 Voisins Le Bretonneux, France) |
| --- |
| - Acetic acid solution (Fisher A/0360/PB17) |
| - Adaptateur secteur Canon AC-E6N( Canon Europa N.V. Bovenkerkerweg 59, 1185 XB Amstelveen, The Netherlands) |
| - Aniline blue solution (Serlabo 7629) |
| - Biebrich scarlet-acid fuchsin solution (Sigma HT151) |
| - Bouin's solution (HT10132-1L) |
| - CaCl₂ (Sigma BCCK 2663) |
| - Canada balsam resinous mounting medium (Sigma 1.01691.0025). |
| - Canon EOS 5DS ( Canon Europa N.V. Bovenkerkerweg 59, 1185 XB Amstelveen, The Netherlands) |
| - EDTA (Sigma E1644) |
| - Elegoo saturn 3D printer (3D France, 12G rue de l'Europe, 31150 LESPINASSE, France) |
| - Ethanol (Fisher Chemical E/0600DF/15) |
| - Godox MS300(Godox Store operated by Next77 sp. z o.o. ul. Bonarka 11, 30-417 Kraków, Pologne) |
| - HEPES (Sigma H3375) |
| - Hydrogen peroxide 30% ThermoFisher H/1750/15) |
| - KCl (Sigma P3911) |
| - Leica RM 2155 (LEICA MICROSYSTEMES SA, 1 rue du 1er mai, immeuble axe sur seine, halle c2, 50169, NANTERRE CEDEX, 92752 France) |
| - Lightroom (Adobe, 345 Park Avenue, San Jose, CA 95110-2704) |
| - MgCl₂ (Sigma BCCK 5242) |
| - MgSO₄ (Sigma M7506) |
| - Milli-Q water (Merk, Millipore) |
| - NaCl (Sigma S9888) |
| - NaHCO₃ (Sigma S6297) |
| - Nikon SMZ1270 trinocular (Nikon France succursale de Nikon Europe BV, 191 rue du Marché Rollay, 94500 Champigny sur Marne) |
| - PAF (Thermoscientific 043368.9L) |
| - Paraffine (Sigma 0000321694). |
| - Phosphomolybdic-phosphotungstic acid (221856; P4006; Polysciences 25088D-500) |
| - Plankton mixture: Rotifers, Red plankton (ocean nutrition Europe bv, Rijkmakerlaan 15, 2910 Essen - Belgium, ref 1500045, ref 1500010) |
| - Rhino 8 (McNeel Europe, Roger de Flor, 32-34, bajos Barcelona 08018 Spain) |
| - SanDisk Extreme PRO® SDHC™ et SDXC™ UHS-I - 512 Go (Western Digital, Edinburgh Links House, 15 Links Place, Edinburgh, EH6 7EZ) |
| - Silane-coated glass slides (Sigma S4651-72EA). |
| - TC-80N3 Canon ( Canon Europa N.V. Bovenkerkerweg 59, 1185 XB Amstelveen, The Netherlands) |
| - Tris (sigma 10708976001) |
| - Triton X-100 (Sigma T9284) |
| - Weigert's iron hematoxylin working solution (Sigma HT 1079-1 set) |
| - X2T-C (Godox Store operated by Next77 sp. z o.o. ul. Bonarka 11, 30-417 Kraków, Pologne) |
| - Xylene substitute (Sigma 102776486) |
